# Supplementary material
Source: PubMed Central journal article supplement (PMC3864607)
Supplement: NIHMS506802-supplement-01.pdf [file NIHMS506802-supplement-01.pdf]

## Speech Disturbs Face Scanning in 6-Month Olds who Develop Autism Spectrum Disorder

### *Supplementary Information*

**Table S1. Sample characteristics at 6 and 24 months**

| Characteristic   | ASD ( <i>n</i> = 12) | HR-ATYP<br>( <i>n</i> = 29) | HR-TYP<br>( <i>n</i> = 16) | LR-TYP<br>( <i>n</i> = 42) | <i>p</i> value     |
|------------------|----------------------|-----------------------------|----------------------------|----------------------------|--------------------|
| <b>6 months</b>  |                      |                             |                            |                            |                    |
| Age (months)     | 6.33 (.98)           | 6.40 (.39)                  | 6.39 (.43)                 | 6.23 (.35)                 | .473               |
| Male Sex (%)     | 67                   | 79                          | 56                         | 55                         | .177               |
| Mullen VR AE     | 6.00 (.63)           | 5.55 (1.55)                 | 6.00 (.97)                 | 6.00 (.77)                 | .329               |
| Mullen FM AE     | 5.45 (1.44)          | 5.10 (1.32)                 | 6.06 (1.34)                | 6.17 (1.18)                | .006 <sup>a</sup>  |
| Mullen RL AE     | 4.91 (1.30)          | 4.86 (1.46)                 | 5.06 (.93)                 | 5.37 (1.24)                | .389               |
| Mullen EL AE     | 4.73 (.79)           | 4.38 (1.05)                 | 4.81 (.66)                 | 4.80 (.75)                 | .178               |
| <b>24 months</b> |                      |                             |                            |                            |                    |
| Age (months)     | 25.13 (2.05)         | 24.49 (.86)                 | 24.29 (.63)                | 24.21 (.39)                | .102               |
| ADOS 1 Total     | 11.58 (5.35)         | 7.82 (3.15)                 | 3.07 (2.28)                | 3.39 (2.79)                | <.001 <sup>b</sup> |
| Verbal DQ        | 91.62 (33.4)         | 101.8 (21.8)                | 124.1 (11.5)               | 125.4 (16.6)               | <.001 <sup>c</sup> |
| Nonverbal DQ     | 96.00 (21.5)         | 103.0 (14.5)                | 114.7 (10.9)               | 118.3 (11.2)               | <.001 <sup>c</sup> |

ASD, autism spectrum disorder; HR, high-risk infant sibling; LR, low-risk infant sibling; ATYP, infants with clinically significant symptoms (e.g., developmental delay or abnormal behavioral presentation) in the 2<sup>nd</sup> or 3<sup>rd</sup> year of life, not meeting criteria for ASD; TYP, infants with typical development in the 2<sup>nd</sup> and 3<sup>rd</sup> years of life; AE, age equivalent performance in months; VR, visual reception; FM, fine motor skills; RL, receptive language; EL, expressive language; ADOS, Autism Diagnostic Observation Schedule; Verbal DQ = 100 x [RL AE + EL AE] / (2 x Age); Nonverbal DQ = 100 x [VR AE + FM AE] / (2 x Age).

<sup>a</sup> HR-ATYP < LR-TYP.

<sup>b</sup> ASD < HR-ATYP < (HR-TYP = LR-TYP).

<sup>c</sup> (ASD = HR-ATYP) < (HR-TYP = LR-TYP).

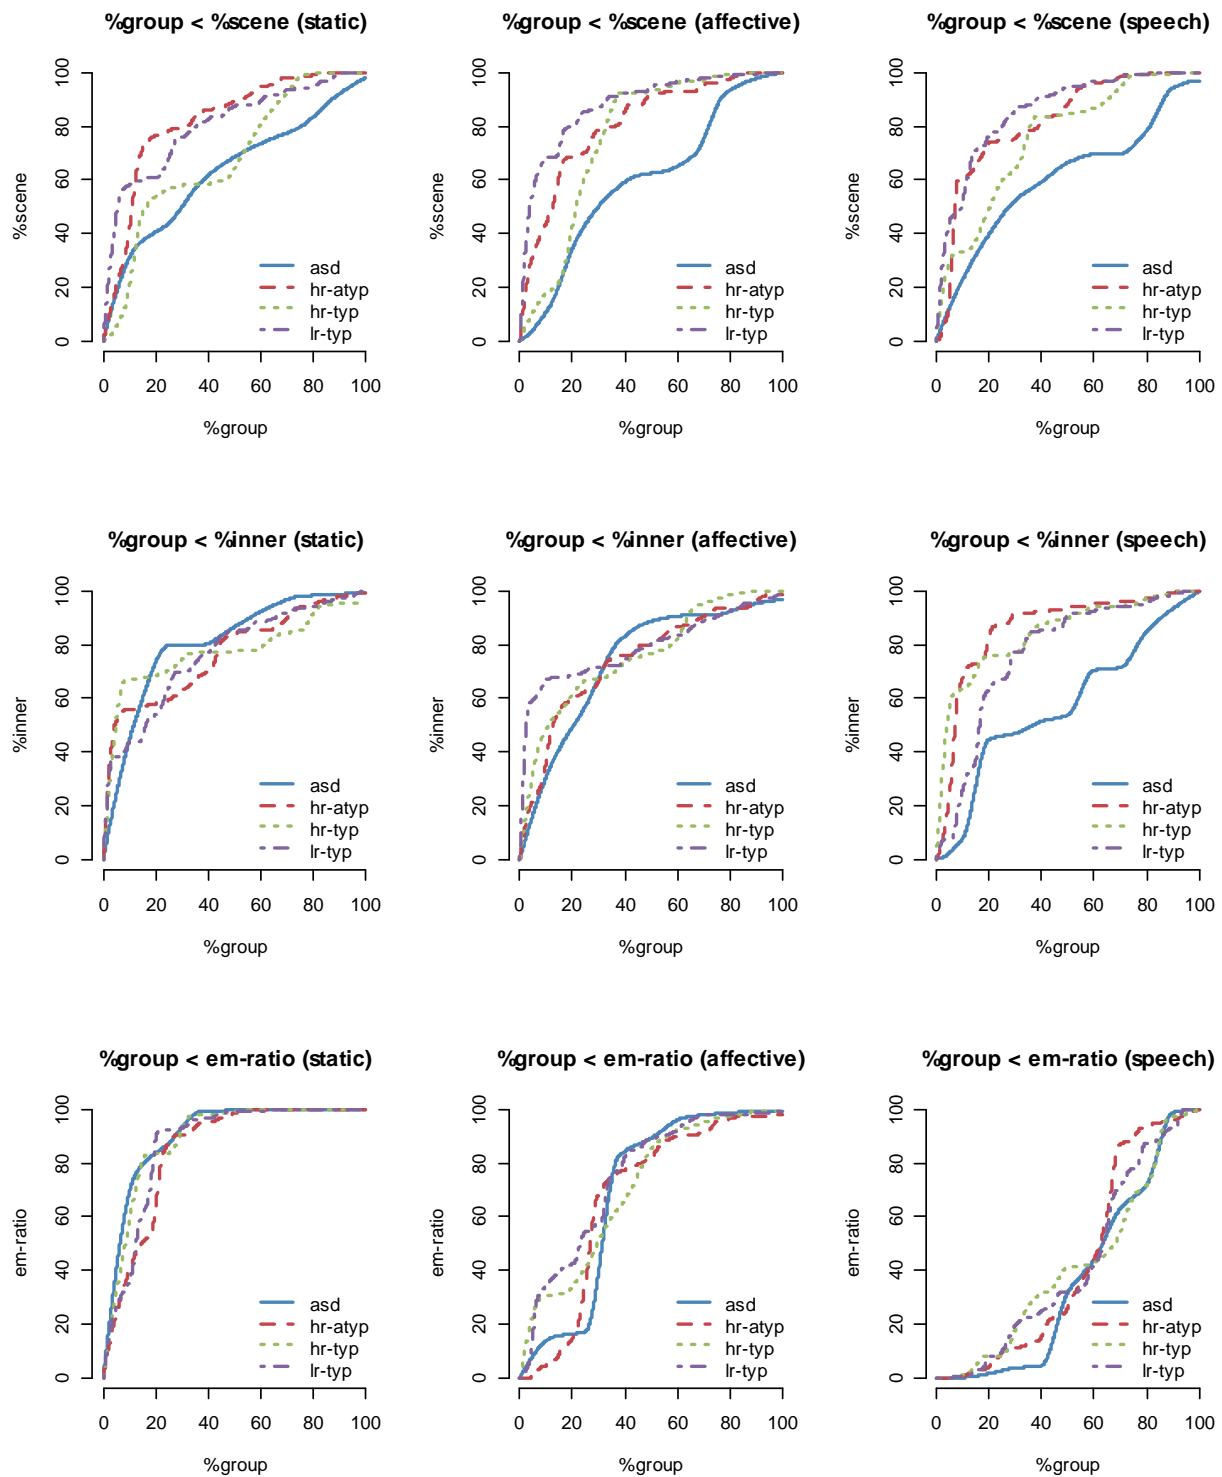

**Figure S1.** Proportion of each group accounted for by performance below particular values on eye-tracking outcome measures. em-ratio, eye-to-mouth ratio; see Table S1 for remaining abbreviations.
